# Supplementary material
Source: PubMed Central journal article supplement (PMC2999666)
Supplement: NIHMS250724-supplement-1_si_001.pdf [file NIHMS250724-supplement-1_si_001.pdf]

## SUPPORTING INFORMATION

Table S1: Average contour lengths of force peaks in F-D curves

| Stable structural segments<br>(peak position) | Contour length $\pm$ SD (aa) |              |
|-----------------------------------------------|------------------------------|--------------|
|                                               | Bovine                       | Mouse        |
| N1 (15 aa)                                    | 15 $\pm$ 3                   | 16 $\pm$ 3   |
| N2 (26 aa)                                    | 26 $\pm$ 5                   | 27 $\pm$ 5   |
| H1-C1-H2 (37 aa)                              | 37 $\pm$ 5                   | 38 $\pm$ 5   |
| E1 (97 aa)                                    | 97 $\pm$ 5                   | 96 $\pm$ 6   |
| H3-C2-H4-E2 (108 aa)                          | 108 $\pm$ 3                  | 109 $\pm$ 4  |
| H5-C3-H6.1 (122 aa)                           | 122 $\pm$ 7                  | 123 $\pm$ 7  |
| H6.2-E3-H7 (169 aa)                           | 169 $\pm$ 11                 | 173 $\pm$ 10 |
| H8 (220 aa)                                   | 220 $\pm$ 7                  | 215 $\pm$ 12 |
| CT (238 aa)                                   | 238 $\pm$ 7                  | 240 $\pm$ 7  |

Contour lengths represent most probable peak positions obtained from Gaussian fits to the contour length distributions shown in Figure 2. Errors represent standard deviations of the force peak positions.

Table S2: Extra sum of squares F-test for DFS data

| Sample          | Segment     | Sum of squares (dof) <sup>a</sup> |                     | F-ratio <sup>d</sup> | P-value <sup>e</sup> | Common parameters   |                                   |
|-----------------|-------------|-----------------------------------|---------------------|----------------------|----------------------|---------------------|-----------------------------------|
|                 |             | Separate <sup>b</sup>             | Common <sup>c</sup> |                      |                      | $x_u$ (nm) $\pm$ SE | $k_u$ (s <sup>-1</sup> ) $\pm$ SE |
| Bovine<br>Mouse | N1          | 223.6 (4)<br>1116 (4)             | 2677 (10)           | 3.993                | 0.063                | 0.43 $\pm$ 0.14     | 0.18 $\pm$ 0.55                   |
| Bovine<br>Mouse | N2          | 182.8 (4)<br>778.4 (4)            | 1182 (10)           | 0.918                | 0.438                | 0.35 $\pm$ 0.06     | 0.40 $\pm$ 0.56                   |
| Bovine<br>Mouse | H1-C1-H2    | 158.5 (4)<br>1037 (4)             | 1408 (10)           | 0.714                | 0.519                | 0.32 $\pm$ 0.05     | 0.61 $\pm$ 0.75                   |
| Bovine<br>Mouse | E1          | 87.3 (4)<br>175.6 (4)             | 340.9 (10)          | 1.188                | 0.353                | 0.42 $\pm$ 0.04     | 0.10 $\pm$ 0.09                   |
| Bovine<br>Mouse | H3-C2-H4-E2 | 354.8 (4)<br>366.7 (4)            | 795.6 (10)          | 0.411                | 0.677                | 0.28 $\pm$ 0.03     | 0.36 $\pm$ 0.29                   |
| Bovine<br>Mouse | H5-C3-H6.1  | 283.7 (4)<br>16.97 (4)            | 639.4 (10)          | 4.508                | 0.049                | 0.31 $\pm$ 0.03     | 0.14 $\pm$ 0.12                   |
| Bovine<br>Mouse | H6.2-E3-H7  | 71.46 (4)<br>284.4 (4)            | 507.4 (10)          | 1.686                | 0.245                | 0.81 $\pm$ 0.21     | 0.03 $\pm$ 0.07                   |
| Bovine<br>Mouse | H8          | 168.1 (4)<br>454.3 (4)            | 661.3 (10)          | 0.250                | 0.785                | 0.63 $\pm$ 0.14     | 0.01 $\pm$ 0.03                   |
| Bovine<br>Mouse | CT          | 308.3 (4)<br>492.1 (4)            | 963.7 (10)          | 0.816                | 0.476                | 0.37 $\pm$ 0.06     | 0.27 $\pm$ 0.28                   |

The DFS data from bovine and mouse rhodopsin represented in Figure 4 were analyzed according to Eq. 2 to obtain the parametric values for  $x_u$  and  $k_u$ . <sup>a</sup> The data were analyzed by non-linear least squares regression. No weighting was assigned to the data and the fitting procedure minimized the absolute distances squared and are listed in the table. The degrees of freedom (dof) are indicated in parentheses. <sup>b</sup> Data from bovine and mouse rhodopsin were fitted with Eq. 2 individually with separate estimates for  $x_u$  and  $k_u$ . The fitted values of these parameters are reported in Table 1. <sup>c</sup> Data from bovine and mouse rhodopsin were fitted with Eq. 2 simultaneously with single estimates for  $x_u$  and  $k_u$  for both data. The common parameters derived from the simultaneous analysis are reported here. <sup>d</sup> The difference in fits to Eq. 2 when bovine and mouse rhodopsin data were analyzed separately or simultaneously

was assessed by an F-test. The F-ratio quantifies the relationship between the relative increase in the sum-of-squares and the relative increase in the degrees of freedom, and is given by  $F = ((SSQ1-SSQ2)/(dof1-dof2))/(SSQ2/dof2)$ . SSQ1 and SSQ2 denote the sum of squares of the two fits that are being compared, and dof1 and dof2 denote the degrees of freedom of the two fits that are being compared. <sup>e</sup> The corresponding P-value from the F-test.

A

```

B.taurus  MNGTEGPNFYVPFSNKTGVVRSPEAPQYYLAEPWQFSMLAAYMFLLIIMLGFPINFLTLY 60
M.musculus MNGTEGPNFYVPFSNVTGVVRSPEQPQYYLAEPWQFSMLAAYMFLLIIVLGFPINFLTLY 60
*****
*****

B.taurus  VTVQHKKLRTPLNYILLNLAVADLFMVFGGFTTTLTYSLHGYPVFGPTGCNLEGFFATLG 120
M.musculus VTVQHKKLRTPLNYILLNLAVADLFMVFGGFTTTLTYSLHGYPVFGPTGCNLEGFFATLG 120
*****

B.taurus  GEIALWLSLVLAIERVVVCKPMSNFRFGENHAIMGVAFTWVMALACAAPPLVGWSRYIP 180
M.musculus GEIALWLSLVLAIERVVVCKPMSNFRFGENHAIMGVVFTWIMALACAAPPLVGWSRYIP 180
*****

B.taurus  EGMQCSCGIDYYPHEETNNEFVIYMFVVFHFIIPLIVIFFCYQQLVFTVKEAAAQQQES 240
M.musculus EGMQCSCGIDYTLKPEVNNESFVIYMFVVFHTIPMIVIFFCYQQLVFTVKEAAAQQQES 240
*****

B.taurus  ATTQKAEKEVTRMVIIMVIAFLICWLPYAGVAFYIFTHQGSDFGPIFMTIPAFFAKTSAV 300
M.musculus ATTQKAEKEVTRMVIIMVIFFLICWLPYASVAFYIFTHQGSNFGPIFMTLPAFFAKSSI 300
*****

B.taurus  YNPVIYIMMNKQFRNCMVTTLCCGKNPLGDDASTTVSKTETSQVAPA 348
M.musculus YNPVIYIMLNKQFRNCMLTTLCCGKNPLGDDASATASKTETSQVAPA 348
*****

```

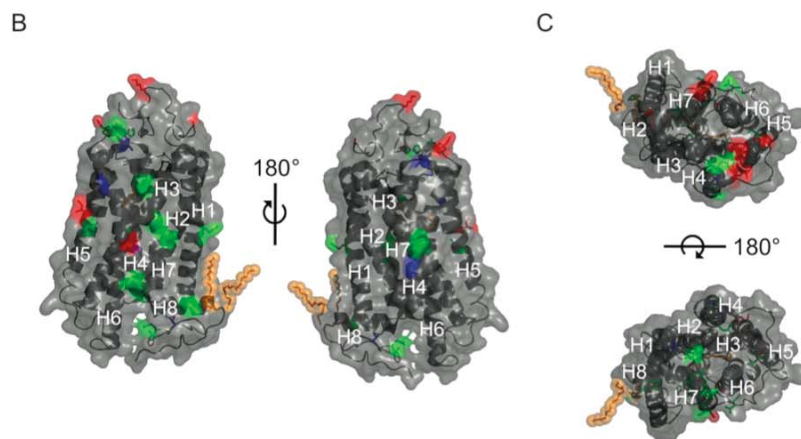

FIGURE S1: Protein sequence alignment of bovine and mouse rhodopsin. (A) Amino acid sequence alignment of *B. taurus* and *M. musculus* rhodopsin (GenBank NP\_001014890 and NP\_663358, respectively) was conducted using ClustalX (2.0.10). Bovine and mouse rhodopsin consist of 348 residues. Most positions share the same amino acid residue (\*). There are 23 amino acid residue differences: 13 are conserved (:), 4 are semi-conserved (.), and 6 are non-conserved (blank) substitutions. (B, C) Conserved (green), semi-conserved (blue), and non-conserved (red) residue substitutions are highlighted on the crystal structure of rhodopsin (PDB: 1U19) in side view (B) or top view (C) with side chains shown in stick representation. The surface representation is semi-transparent.

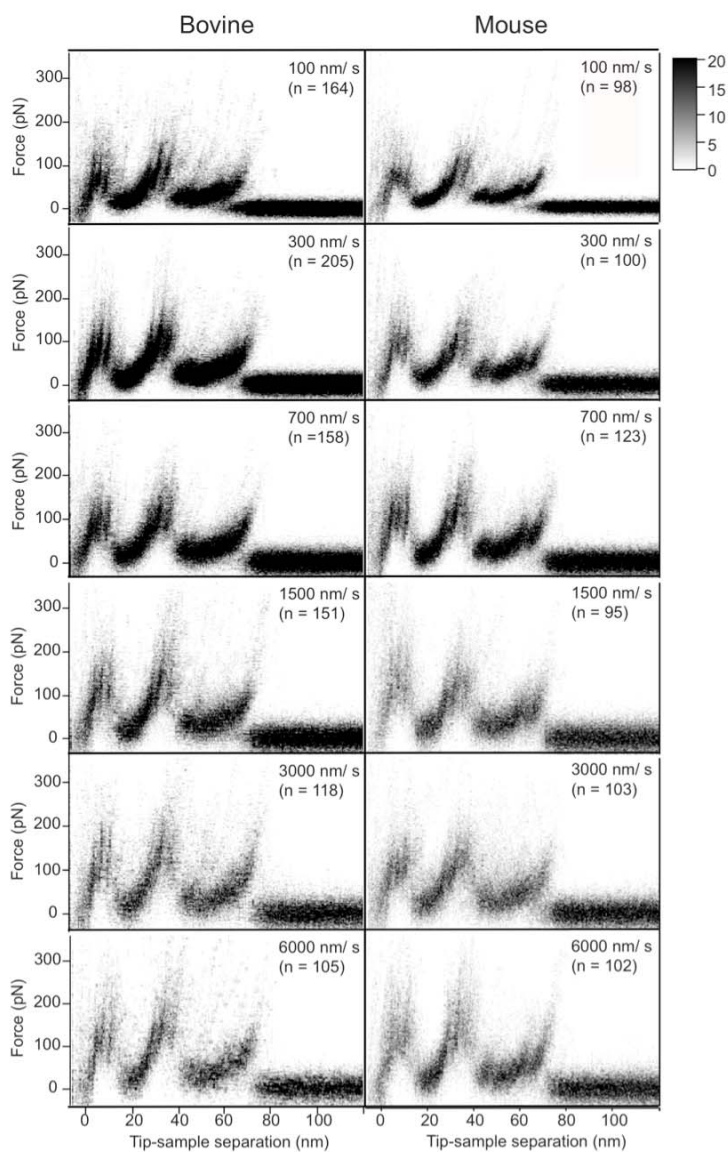

FIGURE S2: Density maps of superimposed F-D curves recorded at individual pulling velocities. Pulling velocities are indicated for each superimposition with the number of F-D curves superimposed (n).

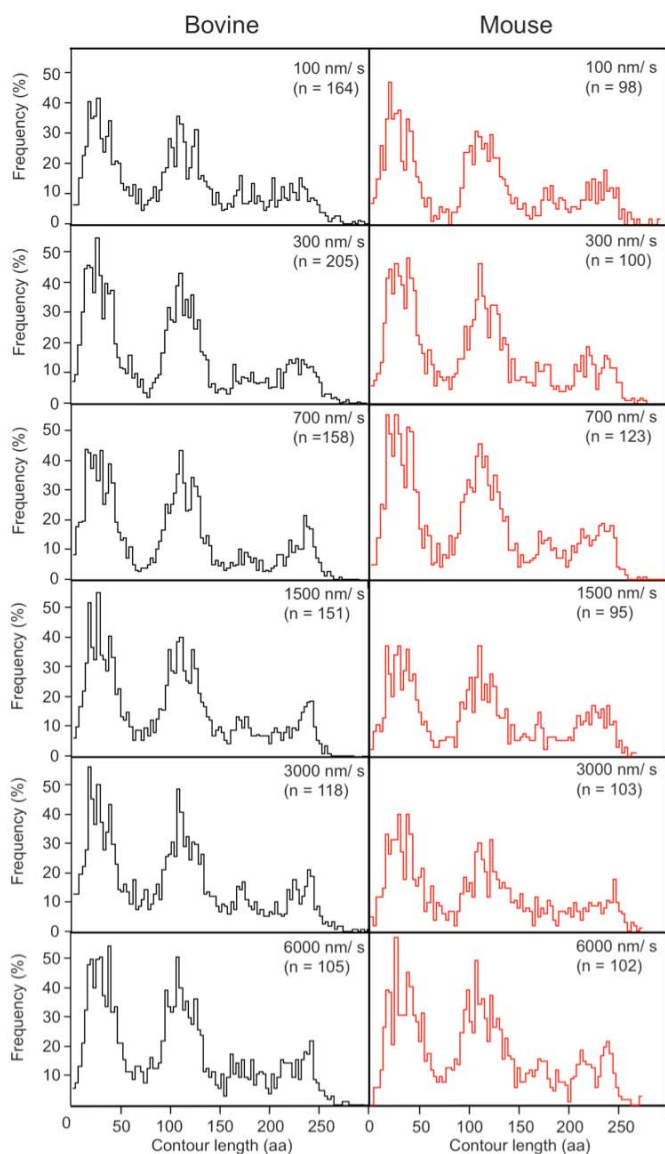

FIGURE S3: Histograms of contour lengths at individual pulling velocities. The contour length was determined for each force peak in F-D curves at individual pulling velocities. The frequency of contour lengths detected is plotted and the number of F-D curves analyzed at each pulling velocity is shown (n).

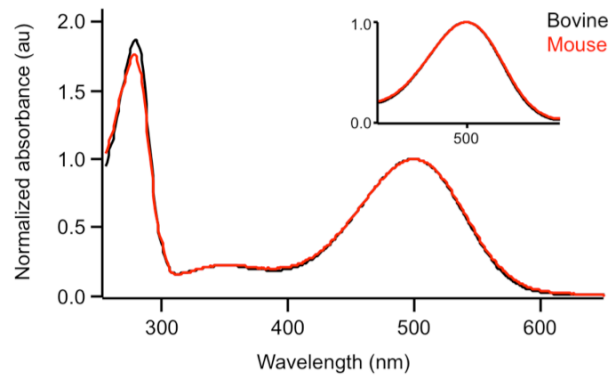

FIGURE S4: UV/Vis absorbance spectra of purified bovine (black line) and mouse (red line) rhodopsin. Both spectra show characteristic maxima at  $\approx 500$  nm. The inset shows a zoomed in view of the region near 500 nm. Rhodopsin was affinity-purified as described in the Materials and Methods section.
